# Supplementary material for: Serum levels of 14-3-3η protein supplement C-reactive protein and rheumatoid arthritis-associated antibodies to predict clinical and radiographic outcomes in a prospective cohort of patients with recent-onset inflammatory polyarthritis
Source: Springer Nature journal article supplement (doi:10.1186/s13075-016-0935-z), 2016-02-01
Supplement: MOESM1 [file 9784304]

**Supplementary Table 1. Distribution of 14-3-3 $\eta$  over time according to baseline positivity**

|                                                                   | Baseline          | 18 months         | 30 months         | 42 months         | 60 months         |
|-------------------------------------------------------------------|-------------------|-------------------|-------------------|-------------------|-------------------|
| <b>All patients:</b>                                              |                   |                   |                   |                   |                   |
| n total                                                           | 331               | 324               | 319               | 323               | 323               |
| 14-3-3 $\eta$ , median (IQR)                                      | 0.14 (0.03-1.86)  | 0.11 (0.03-1.12)  | 0.11 (0.03-0.99)  | 0.10 (0.02-0.93)  | 0.13 (0.02-1.14)  |
| 14-3-3 $\eta$ ≥0.19, n (%)                                        | 153 (46.2)        | 149 (46.0)        | 134 (42.0)        | 127 (39.3)        | 143 (44.3)        |
| 14-3-3 $\eta$ ≥0.50, n (%)                                        | 119 (36.0)        | 105 (32.4)        | 101 (31.7)        | 93 (28.8)         | 108 (33.4)        |
| <b>Patients with 14-3-3<math>\eta</math>≥0.19 at baseline:</b>    |                   |                   |                   |                   |                   |
| n total                                                           | 153               | 151               | 148               | 148               | 149               |
| 14-3-3 $\eta$ , median (IQR)                                      | 2.79 (0.59-21.00) | 1.27 (0.31-9.01)  | 1.03 (0.24-11.94) | 1.08 (0.24-7.83)  | 1.13 (0.28-8.12)  |
| 14-3-3 $\eta$ ≥0.19, n (%)                                        | ---               | 130 (86.1)        | 120 (81.1)        | 117 (79.1)        | 124 (83.2)        |
| <b>Patients with 14-3-3<math>\eta</math>≥0.50 at baseline:</b>    |                   |                   |                   |                   |                   |
| n total                                                           | 119               | 117               | 114               | 116               | 118               |
| 14-3-3 $\eta$ , median (IQR)                                      | 6.26 (1.59-21.00) | 2.27 (0.69-14.12) | 1.98 (0.53-15.63) | 2.15 (0.39-12.79) | 2.28 (0.52-13.19) |
| 14-3-3 $\eta$ ≥0.50, n (%)                                        | ---               | 94 (80.3)         | 89 (78.1)         | 82 (70.7)         | 89 (75.4)         |
| <b>Patients with 14-3-3<math>\eta</math>&lt;0.19 at baseline:</b> |                   |                   |                   |                   |                   |
| n total                                                           | 178               | 173               | 171               | 175               | 174               |
| 14-3-3 $\eta$ , median (IQR)                                      | 0.04 (0.01-0.09)  | 0.03 (0.01-0.08)  | 0.03 (0.01-0.08)  | 0.03 (0.01-0.07)  | 0.03 (0.01-0.08)  |
| 14-3-3 $\eta$ <0.19, n (%)                                        | ---               | 154 (89.0)        | 157 (91.8)        | 165 (94.3)        | 155 (89.1)        |
| <b>Patients with 14-3-3<math>\eta</math>&lt;0.50 at baseline:</b> |                   |                   |                   |                   |                   |
| n total                                                           | 212               | 207               | 205               | 207               | 205               |
| 14-3-3 $\eta$ , median (IQR)                                      | 0.06 (0.02-0.12)  | 0.05 (0.02-0.10)  | 0.05 (0.01-0.12)  | 0.04 (0.01-0.10)  | 0.04 (0.01-0.14)  |
| 14-3-3 $\eta$ <0.50, n (%)                                        | ---               | 196 (94.7)        | 193 (94.1)        | 196 (94.7)        | 186 (90.7)        |

IQR: Interquartile range (25th-75th percentiles)
