# Supplementary material for: Serum levels of 14-3-3η protein supplement C-reactive protein and rheumatoid arthritis-associated antibodies to predict clinical and radiographic outcomes in a prospective cohort of patients with recent-onset inflammatory polyarthritis
Source: Springer Nature journal article supplement (doi:10.1186/s13075-016-0935-z), 2016-02-01
Supplement: MOESM2 [file 9784304]

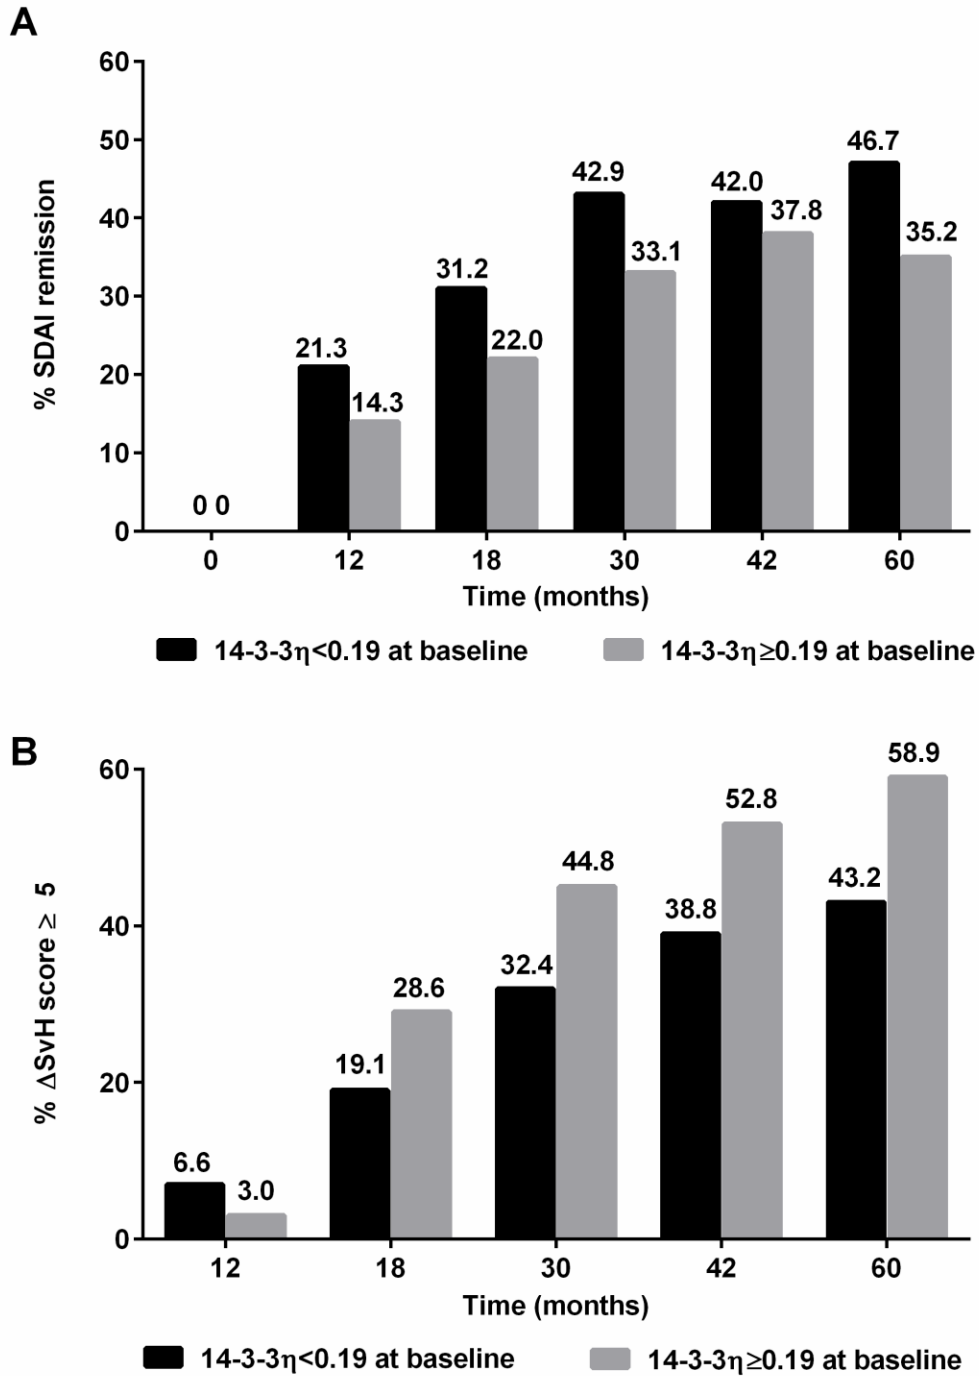

**Supplementary Figure 1. SDAI remission (A) and radiographic progression (B) over 5 years according to baseline 14-3-3 $\eta$  positivity.** GEE analyses were performed to compare SDAI scores and radiographic progression over time with baseline 14-3-3 $\eta$   $\geq$  0.19 ng/ml. A) SDAI remission over time was significantly lower in patients with baseline 14-3-3 $\eta$   $\geq$  0.19 (RR=0.79 (95%CI 0.64-0.97), p=0.03) B) Definite radiographic progression ( $\Delta$ SvH  $\geq$  5) over time was significantly higher in patients with baseline 14-3-3 $\eta$   $\geq$  0.19 ng/ml (RR=1.39 (95%CI 1.11-1.74), p=0.005).
